# Supplementary material
Source: MDPI journal article supplement (https://www.mdpi.com/2073-4441/16/2/356)
Supplement: s1 [file s1]

# Integrated Hydrological Modeling for Watershed Analysis, Flood Prediction, and Mitigation Using Meteorological and Morphometric Data, SCS-CN, HEC-HMS/RAS, and QGIS

Heba El-Bagoury <sup>1</sup>, and Ahmed Gad <sup>2,3,\*</sup>

<sup>1</sup> Geography Department, Faculty of Arts, Port Said University, Port Said 42511, Egypt;

<sup>2</sup> College of Science, Geosciences Department, United Arab Emirates University, Al Ain 15551, UAE

<sup>3</sup> Geology Department, Faculty of Science, Ain Shams University, Cairo 11566, Egypt

\* Correspondence: a.gad@sci.asu.edu.eg

**Table S1.** Giza station records of maximum rainfall data from 1990 – 2021.

| Year | Max. Rainfall (mm) | Year | Max. Rainfall (mm) |
|------|--------------------|------|--------------------|
| 1990 | 12.00              | 2006 | 10.00              |
| 1991 | 9.00               | 2007 | 6.00               |
| 1992 | 11.00              | 2008 | 8.00               |
| 1993 | 6.00               | 2009 | 7.00               |
| 1994 | 9.00               | 2010 | 5.00               |
| 1995 | 7.00               | 2011 | 5.00               |
| 1996 | 4.00               | 2012 | 16.00              |
| 1997 | 7.00               | 2013 | 17.00              |
| 1998 | 4.00               | 2014 | 8.00               |
| 1999 | 6.00               | 2015 | 5.00               |
| 2000 | 11.00              | 2016 | 5.00               |
| 2001 | 9.00               | 2017 | 10.00              |
| 2002 | 7.00               | 2018 | 11.00              |
| 2003 | 7.00               | 2019 | 31.00              |
| 2004 | 7.00               | 2020 | 11.00              |
| 2005 | 6.00               | 2021 | 10.00              |

**Table S2.** Morphometric characteristics of wadi An-Nawayah sub-basins.

| Sub-basin No. | Area (Km <sup>2</sup> ) | Longest Flow path length (km) | Longest Flow path Slope (m/m) | Basin slope (m/m) | Basin Relief (m) | Relief Ratio | Elonga-tion Ratio | Density (km/km <sup>2</sup> ) | CN          |
|---------------|-------------------------|-------------------------------|-------------------------------|-------------------|------------------|--------------|-------------------|-------------------------------|-------------|
| 1             | 12.80                   | 14.10                         | 0.022                         | 0.13              | 316              | 0.022        | 0.29              | 0.54                          | 94.3        |
| 2             | 15.00                   | 9.77                          | 0.023                         | 0.09              | 221              | 0.023        | 0.45              | 0.23                          | 85.9        |
| 3             | 13.30                   | 15.72                         | 0.023                         | 0.19              | 358              | 0.023        | 0.26              | 0.57                          | 94.0        |
| 4             | 33.80                   | 25.60                         | 0.018                         | 0.18              | 451              | 0.018        | 0.26              | 0.56                          | 94.6        |
| 5             | 12.90                   | 10.22                         | 0.024                         | 0.16              | 250              | 0.024        | 0.40              | 0.33                          | 96.3        |
| 6             | 7.00                    | 6.30                          | 0.019                         | 0.14              | 119              | 0.019        | 0.47              | 0.01                          | 95.9        |
| 7             | 8.30                    | 8.38                          | 0.015                         | 0.12              | 139              | 0.017        | 0.39              | 0.23                          | 92.6        |
| 8             | 38.10                   | 26.39                         | 0.009                         | 0.13              | 249              | 0.009        | 0.26              | 0.50                          | 94.2        |
| 9             | 8.30                    | 10.38                         | 0.020                         | 0.15              | 209              | 0.020        | 0.31              | 0.28                          | 94.9        |
| 10            | 21.20                   | 14.34                         | 0.016                         | 0.20              | 239              | 0.017        | 0.36              | 0.42                          | 96.8        |
| 11            | 28.30                   | 19.88                         | 0.009                         | 0.14              | 180              | 0.009        | 0.30              | 0.48                          | 94.1        |
| 12            | 17.30                   | 12.78                         | 0.018                         | 0.22              | 231              | 0.018        | 0.37              | 0.68                          | 97.8        |
| 13            | 2.10                    | 3.80                          | 0.050                         | 0.29              | 192              | 0.051        | 0.43              | 1.53                          | 96.7        |
| 14            | 6.20                    | 7.27                          | 0.025                         | 0.29              | 179              | 0.025        | 0.38              | 1.00                          | 97.8        |
| 15            | 7.20                    | 9.61                          | 0.024                         | 0.34              | 234              | 0.024        | 0.31              | 1.25                          | 96.7        |
| 16            | 4.60                    | 4.78                          | 0.035                         | 0.28              | 192              | 0.040        | 0.51              | 0.92                          | 96.3        |
| 17            | 29.50                   | 18.71                         | 0.017                         | 0.21              | 318              | 0.017        | 0.33              | 0.56                          | 93.9        |
| 18            | 4.80                    | 5.19                          | 0.033                         | 0.10              | 174              | 0.034        | 0.48              | 0.67                          | 87.7        |
| 19            | 2.20                    | 3.39                          | 0.013                         | 0.08              | 80               | 0.024        | 0.49              | 0.76                          | 91.3        |
| 20            | 3.10                    | 4.20                          | 0.024                         | 0.11              | 105              | 0.025        | 0.47              | 1.18                          | 89.8        |
| 21            | 15.90                   | 8.65                          | 0.016                         | 0.07              | 137              | 0.016        | 0.52              | 0.41                          | 83.5        |
| <b>Min.</b>   | <b>2.10</b>             | <b>3.39</b>                   | <b>0.009</b>                  | <b>0.07</b>       | <b>80.00</b>     | <b>0.009</b> | <b>0.26</b>       | <b>0.01</b>                   | <b>83.5</b> |
| <b>Max.</b>   | <b>38.10</b>            | <b>26.39</b>                  | <b>0.050</b>                  | <b>0.34</b>       | <b>451.00</b>    | <b>0.051</b> | <b>0.52</b>       | <b>1.53</b>                   | <b>97.8</b> |
| <b>Mean</b>   | <b>13.90</b>            | <b>11.40</b>                  | <b>0.022</b>                  | <b>0.17</b>       | <b>217.76</b>    | <b>0.023</b> | <b>0.38</b>       | <b>0.62</b>                   | <b>93.6</b> |

Table S3. Morphometric characteristics of sub-basins of wadi Al-Rashrash.

| Sub-basin No. | Area (Km <sup>2</sup> ) | Longest Flow path length (km) | Longest Flow path Slope (m/m) | Basin slope (m/m) | Basin Relief (m) | Relief Ratio | Elonga-tion Ratio | Density (km/km <sup>2</sup> ) | CN          |
|---------------|-------------------------|-------------------------------|-------------------------------|-------------------|------------------|--------------|-------------------|-------------------------------|-------------|
| 1             | 31.10                   | 11.70                         | 0.017                         | 0.10              | 1062.99          | 0.017        | 0.33              | 0.50                          | 86.4        |
| 2             | 20.50                   | 7.20                          | 0.016                         | 0.14              | 626.64           | 0.016        | 0.44              | 0.36                          | 96.2        |
| 3             | 21.10                   | 7.40                          | 0.015                         | 0.14              | 675.85           | 0.017        | 0.44              | 0.45                          | 97.0        |
| 4             | 21.20                   | 12.60                         | 0.018                         | 0.19              | 1204.07          | 0.018        | 0.26              | 0.82                          | 94.9        |
| 5             | 13.50                   | 7.20                          | 0.020                         | 0.18              | 793.96           | 0.021        | 0.36              | 0.32                          | 94.2        |
| 6             | 28.50                   | 11.90                         | 0.012                         | 0.12              | 751.31           | 0.012        | 0.31              | 0.60                          | 96.1        |
| 7             | 24.30                   | 8.60                          | 0.014                         | 0.11              | 633.20           | 0.014        | 0.40              | 0.49                          | 94.2        |
| 8             | 10.90                   | 5.80                          | 0.019                         | 0.14              | 606.96           | 0.020        | 0.40              | 0.20                          | 96.7        |
| 9             | 11.90                   | 7.40                          | 0.016                         | 0.17              | 639.76           | 0.016        | 0.33              | 0.18                          | 97.9        |
| 10            | 35.10                   | 11.10                         | 0.012                         | 0.12              | 741.47           | 0.013        | 0.37              | 0.54                          | 96.5        |
| 11            | 21.30                   | 6.70                          | 0.014                         | 0.11              | 505.25           | 0.014        | 0.48              | 0.32                          | 95.9        |
| 12            | 11.20                   | 5.20                          | 0.013                         | 0.14              | 393.70           | 0.014        | 0.45              | 0.09                          | 96.9        |
| 13            | 71.20                   | 16.70                         | 0.010                         | 0.11              | 882.55           | 0.010        | 0.35              | 0.43                          | 97.2        |
| 14            | 13.90                   | 6.10                          | 0.008                         | 0.09              | 298.56           | 0.009        | 0.43              | 0.28                          | 96.9        |
| 15            | 0.40                    | 0.90                          | 0.067                         | 0.24              | 318.24           | 0.068        | 0.48              | 2.69                          | 98.0        |
| 16            | 3.10                    | 2.50                          | 0.030                         | 0.25              | 485.56           | 0.036        | 0.49              | 1.73                          | 97.3        |
| 17            | 5.40                    | 2.90                          | 0.025                         | 0.16              | 436.35           | 0.028        | 0.55              | 0.92                          | 98.0        |
| 18            | 20.80                   | 8.90                          | 0.015                         | 0.17              | 695.54           | 0.015        | 0.36              | 0.73                          | 97.6        |
| 19            | 19.60                   | 7.80                          | 0.015                         | 0.16              | 646.33           | 0.016        | 0.40              | 0.60                          | 97.7        |
| 20            | 3.20                    | 2.80                          | 0.040                         | 0.21              | 600.39           | 0.041        | 0.45              | 1.05                          | 98.0        |
| 21            | 30.30                   | 9.50                          | 0.016                         | 0.24              | 810.37           | 0.016        | 0.40              | 0.59                          | 97.2        |
| 22            | 6.80                    | 3.80                          | 0.026                         | 0.24              | 547.90           | 0.027        | 0.48              | 0.96                          | 98.0        |
| 23            | 45.00                   | 11.60                         | 0.013                         | 0.22              | 830.05           | 0.014        | 0.41              | 0.48                          | 96.8        |
| 24            | 13.70                   | 5.10                          | 0.026                         | 0.30              | 784.12           | 0.029        | 0.51              | 0.71                          | 96.8        |
| 25            | 72.50                   | 20.80                         | 0.013                         | 0.29              | 1430.45          | 0.013        | 0.29              | 0.71                          | 95.1        |
| 26            | 42.30                   | 12.30                         | 0.016                         | 0.12              | 1056.43          | 0.016        | 0.37              | 0.64                          | 87.9        |
| 27            | 13.10                   | 9.90                          | 0.010                         | 0.05              | 541.34           | 0.010        | 0.26              | 0.93                          | 80.4        |
| <b>Min.</b>   | <b>0.40</b>             | <b>0.90</b>                   | <b>0.008</b>                  | <b>0.05</b>       | <b>298.56</b>    | <b>0.009</b> | <b>0.26</b>       | <b>0.09</b>                   | <b>80.4</b> |
| <b>Max.</b>   | <b>72.50</b>            | <b>20.80</b>                  | <b>0.067</b>                  | <b>0.30</b>       | <b>1430.45</b>   | <b>0.068</b> | <b>0.55</b>       | <b>2.69</b>                   | <b>98.0</b> |
| <b>Mean</b>   | <b>22.66</b>            | <b>8.31</b>                   | <b>0.019</b>                  | <b>0.17</b>       | <b>703.68</b>    | <b>0.020</b> | <b>0.40</b>       | <b>0.68</b>                   | <b>95.4</b> |

**Table S4.** Lag Time values of Sub-basins of wadi An-Nawayah sub-basins.

| Subbasin No. | Length (m)      | Length (ft)     | Basin Slope | Basin Slope (%) | S           | Lag Time (hrs.) | Lag Time (min) |
|--------------|-----------------|-----------------|-------------|-----------------|-------------|-----------------|----------------|
| 1            | 14096.97        | 46238.06        | 0.13        | 13.15           | 0.60        | 1.09            | 65.40          |
| 2            | 9769.68         | 32044.55        | 0.09        | 8.57            | 1.64        | 1.43            | 85.70          |
| 3            | 15723.05        | 51571.60        | 0.19        | 18.86           | 0.64        | 1.01            | 60.50          |
| 4            | 25596.68        | 83957.11        | 0.18        | 17.97           | 0.57        | 1.48            | 88.90          |
| 5            | 10221.41        | 33526.22        | 0.16        | 15.85           | 0.38        | 0.69            | 41.60          |
| 6            | 6299.93         | 20663.77        | 0.14        | 14.14           | 0.43        | 0.51            | 30.50          |
| 7            | 8383.78         | 27498.80        | 0.12        | 11.86           | 0.80        | 0.82            | 49.20          |
| 8            | 26392.83        | 86568.48        | 0.13        | 13.49           | 0.62        | 1.79            | 107.20         |
| 9            | 10379.97        | 34046.30        | 0.15        | 15.43           | 0.54        | 0.76            | 45.90          |
| 10           | 14344.58        | 47050.22        | 0.20        | 20.03           | 0.33        | 0.79            | 47.10          |
| 11           | 19883.84        | 65219.00        | 0.14        | 13.88           | 0.63        | 1.41            | 84.70          |
| 12           | 12779.93        | 41918.17        | 0.22        | 22.40           | 0.22        | 0.64            | 38.40          |
| 13           | 3797.83         | 12456.88        | 0.29        | 29.37           | 0.34        | 0.23            | 13.50          |
| 14           | 7273.62         | 23857.47        | 0.29        | 28.76           | 0.22        | 0.36            | 21.60          |
| 15           | 9609.72         | 31519.88        | 0.34        | 33.75           | 0.34        | 0.44            | 26.50          |
| 16           | 4782.38         | 15686.21        | 0.28        | 27.77           | 0.38        | 0.28            | 17.10          |
| 17           | 18709.32        | 61366.57        | 0.21        | 21.35           | 0.65        | 1.09            | 65.60          |
| 18           | 5185.80         | 17009.42        | 0.10        | 9.57            | 1.40        | 0.76            | 45.70          |
| 19           | 3390.63         | 11121.27        | 0.08        | 8.23            | 0.95        | 0.51            | 30.40          |
| 20           | 4195.21         | 13760.29        | 0.11        | 11.23           | 1.14        | 0.55            | 32.80          |
| 21           | 8652.26         | 28379.41        | 0.07        | 7.05            | 1.98        | 1.55            | 93.10          |
| <b>Min.</b>  | <b>3390.63</b>  | <b>11121.27</b> | <b>0.07</b> | <b>7.05</b>     | <b>0.22</b> | <b>0.23</b>     | <b>13.50</b>   |
| <b>Max.</b>  | <b>26392.83</b> | <b>86568.48</b> | <b>0.34</b> | <b>33.75</b>    | <b>1.98</b> | <b>1.79</b>     | <b>107.20</b>  |
| <b>Mean</b>  | <b>11403.31</b> | <b>37402.84</b> | <b>0.17</b> | <b>17.27</b>    | <b>0.70</b> | <b>0.87</b>     | <b>51.97</b>   |

**Table S5.** Lag Time values of Sub-basins of wadi Al-Rashrash.

| Subbasin No. | Length (m)      | Length (ft)     | Basin Slope | Basin Slope (%) | S           | Lag Time (hrs.) | Lag Time (min) |
|--------------|-----------------|-----------------|-------------|-----------------|-------------|-----------------|----------------|
| 1            | 11727.10        | 38464.79        | 0.10        | 10.45           | 1.57        | 1.47            | 88.20          |
| 2            | 7202.90         | 23625.51        | 0.14        | 13.69           | 0.40        | 0.57            | 34.00          |
| 3            | 7352.14         | 24115.02        | 0.14        | 13.51           | 0.31        | 0.55            | 33.30          |
| 4            | 12608.90        | 41357.26        | 0.19        | 18.90           | 0.54        | 0.81            | 48.40          |
| 5            | 7221.66         | 23687.04        | 0.18        | 17.72           | 0.62        | 0.55            | 33.20          |
| 6            | 11891.50        | 39004.25        | 0.12        | 12.45           | 0.41        | 0.89            | 53.50          |
| 7            | 8559.71         | 28075.85        | 0.11        | 11.42           | 0.62        | 0.79            | 47.30          |
| 8            | 5762.35         | 18900.51        | 0.14        | 13.58           | 0.34        | 0.46            | 27.80          |
| 9            | 7449.06         | 24432.92        | 0.17        | 16.70           | 0.21        | 0.48            | 28.70          |
| 10           | 11135.60        | 36524.67        | 0.12        | 12.41           | 0.36        | 0.83            | 49.70          |
| 11           | 6736.72         | 22096.44        | 0.11        | 10.60           | 0.43        | 0.62            | 37.20          |
| 12           | 5228.85         | 17150.63        | 0.14        | 14.02           | 0.32        | 0.42            | 25.00          |
| 13           | 16672.60        | 54686.13        | 0.11        | 10.97           | 0.29        | 1.17            | 70.30          |
| 14           | 6106.83         | 20030.4         | 0.09        | 8.81            | 0.32        | 0.60            | 35.70          |
| 15           | 882.65          | 2895.092        | 0.24        | 23.56           | 0.20        | 0.07            | 4.40           |
| 16           | 2526.05         | 8285.44         | 0.25        | 24.66           | 0.28        | 0.17            | 10.30          |
| 17           | 2943.55         | 9654.84         | 0.16        | 16.04           | 0.20        | 0.23            | 13.80          |
| 18           | 8916.95         | 29247.6         | 0.17        | 17.19           | 0.25        | 0.55            | 33.20          |
| 19           | 7848.98         | 25744.65        | 0.16        | 15.67           | 0.24        | 0.52            | 31.20          |
| 20           | 2799.88         | 9183.61         | 0.21        | 21.06           | 0.20        | 0.19            | 11.60          |
| 21           | 9528.61         | 31253.84        | 0.24        | 24.25           | 0.29        | 0.50            | 30.20          |
| 22           | 3825.29         | 12546.95        | 0.24        | 24.20           | 0.20        | 0.23            | 13.90          |
| 23           | 11560.50        | 37918.31        | 0.22        | 22.27           | 0.33        | 0.63            | 37.60          |
| 24           | 5081.43         | 16667.09        | 0.30        | 29.93           | 0.33        | 0.28            | 16.80          |
| 25           | 20762.00        | 68099.39        | 0.29        | 29.28           | 0.52        | 0.96            | 57.40          |
| 26           | 12264.70        | 40228.05        | 0.12        | 11.99           | 1.38        | 1.34            | 80.70          |
| 27           | 9851.98         | 32314.49        | 0.05        | 25.04           | 2.44        | 2.25            | 135.20         |
| <b>Min.</b>  | <b>882.65</b>   | <b>2895.09</b>  | <b>0.05</b> | <b>8.81</b>     | <b>0.20</b> | <b>0.07</b>     | <b>4.40</b>    |
| <b>Max.</b>  | <b>20762.00</b> | <b>68099.39</b> | <b>0.30</b> | <b>29.93</b>    | <b>2.44</b> | <b>2.25</b>     | <b>135.20</b>  |
| <b>Mean</b>  | <b>8312.91</b>  | <b>27266.33</b> | <b>0.17</b> | <b>17.42</b>    | <b>0.50</b> | <b>0.67</b>     | <b>40.32</b>   |

**Table S6.** Runoff and losses volumes and peak discharges in sub-basins of W. An-Nawayah during return periods (25, 50 and 100 years).

| Sub-basin No. | 25-year                                |                                                         |                                                    | 50-year                                |                                                         |                                                    | 100-year                               |                                                         |                                                    |
|---------------|----------------------------------------|---------------------------------------------------------|----------------------------------------------------|----------------------------------------|---------------------------------------------------------|----------------------------------------------------|----------------------------------------|---------------------------------------------------------|----------------------------------------------------|
|               | Peak Dis-charge<br>(m <sup>3</sup> /s) | Discharge Volume<br>(×10 <sup>-3</sup> m <sup>3</sup> ) | Loss volume<br>(×10 <sup>-3</sup> m <sup>3</sup> ) | Peak Dis-charge<br>(m <sup>3</sup> /s) | Discharge Volume<br>(×10 <sup>-3</sup> m <sup>3</sup> ) | Loss volume<br>(×10 <sup>-3</sup> m <sup>3</sup> ) | Peak Dis-charge<br>(m <sup>3</sup> /s) | Discharge Volume<br>(×10 <sup>-3</sup> m <sup>3</sup> ) | Loss volume<br>(×10 <sup>-3</sup> m <sup>3</sup> ) |
| 1             | 9.70                                   | 107.00                                                  | 140.60                                             | 17.80                                  | 190.30                                                  | 160.00                                             | 21.70                                  | 231.20                                                  | 166.50                                             |
| 2             | 1.70                                   | 34.20                                                   | 255.10                                             | 5.60                                   | 88.90                                                   | 320.40                                             | 8.00                                   | 119.60                                                  | 345.10                                             |
| 3             | 10.20                                  | 106.30                                                  | 150.50                                             | 18.80                                  | 191.30                                                  | 172.00                                             | 23.00                                  | 233.20                                                  | 179.40                                             |
| 4             | 21.80                                  | 294.20                                                  | 358.10                                             | 39.20                                  | 517.20                                                  | 405.40                                             | 47.60                                  | 626.40                                                  | 421.20                                             |
| 5             | 17.90                                  | 143.10                                                  | 105.60                                             | 29.70                                  | 235.80                                                  | 115.90                                             | 35.20                                  | 280.20                                                  | 119.30                                             |
| 6             | 10.90                                  | 73.50                                                   | 61.18                                              | 18.10                                  | 123.00                                                  | 68.40                                              | 21.60                                  | 146.80                                                  | 70.50                                              |
| 7             | 5.70                                   | 54.40                                                   | 106.20                                             | 11.50                                  | 103.20                                                  | 123.90                                             | 14.40                                  | 127.80                                                  | 130.10                                             |
| 8             | 19.90                                  | 312.90                                                  | 421.80                                             | 36.80                                  | 558.60                                                  | 480.60                                             | 45.00                                  | 679.50                                                  | 505.50                                             |
| 9             | 8.80                                   | 75.50                                                   | 84.90                                              | 15.50                                  | 131.30                                                  | 95.60                                              | 18.70                                  | 158.40                                                  | 99.20                                              |
| 10            | 29.50                                  | 252.70                                                  | 156.00                                             | 47.50                                  | 408.60                                                  | 169.50                                             | 55.90                                  | 482.60                                                  | 173.80                                             |
| 11            | 17.30                                  | 229.10                                                  | 316.50                                             | 31.80                                  | 410.60                                                  | 361.20                                             | 38.90                                  | 500.00                                                  | 376.30                                             |
| 12            | 31.80                                  | 238.70                                                  | 94.90                                              | 48.90                                  | 371.00                                                  | 100.80                                             | 56.70                                  | 433.10                                                  | 102.60                                             |
| 13            | 5.10                                   | 24.40                                                   | 15.60                                              | 8.30                                   | 39.60                                                   | 17.00                                              | 9.80                                   | 46.80                                                   | 17.50                                              |
| 14            | 15.80                                  | 85.00                                                   | 33.80                                              | 24.10                                  | 132.20                                                  | 35.90                                              | 28.00                                  | 154.30                                                  | 36.60                                              |
| 15            | 13.90                                  | 84.20                                                   | 53.90                                              | 22.60                                  | 136.60                                                  | 58.70                                              | 26.60                                  | 161.60                                                  | 60.30                                              |
| 16            | 10.10                                  | 51.30                                                   | 37.80                                              | 16.50                                  | 84.50                                                   | 41.50                                              | 19.50                                  | 100.40                                                  | 42.70                                              |
| 17            | 20.80                                  | 232.50                                                  | 337.20                                             | 39.00                                  | 419.80                                                  | 386.10                                             | 47.90                                  | 512.50                                                  | 402.70                                             |
| 18            | 1.20                                   | 14.80                                                   | 77.20                                              | 3.60                                   | 34.80                                                   | 95.40                                              | 4.90                                   | 45.70                                                   | 102.10                                             |
| 19            | 1.60                                   | 11.90                                                   | 30.60                                              | 3.40                                   | 23.80                                                   | 36.40                                              | 4.40                                   | 30.00                                                   | 38.40                                              |
| 20            | 1.60                                   | 13.30                                                   | 46.30                                              | 3.90                                   | 28.40                                                   | 55.9                                               | 5.10                                   | 36.30                                                   | 59.40                                              |
| 21            | 0.90                                   | 22.90                                                   | 283.80                                             | 3.80                                   | 70.20                                                   | 363.60                                             | 5.70                                   | 98.10                                                   | 394.50                                             |
| <b>Min.</b>   | <b>0.90</b>                            | <b>11.90</b>                                            | <b>15.60</b>                                       | <b>3.40</b>                            | <b>23.80</b>                                            | <b>17.00</b>                                       | <b>4.40</b>                            | <b>30.00</b>                                            | <b>17.50</b>                                       |
| <b>Max.</b>   | <b>31.80</b>                           | <b>312.90</b>                                           | <b>421.80</b>                                      | <b>48.90</b>                           | <b>558.60</b>                                           | <b>480.60</b>                                      | <b>56.70</b>                           | <b>679.50</b>                                           | <b>505.50</b>                                      |
| <b>Mean</b>   | <b>12.20</b>                           | <b>117.23</b>                                           | <b>150.84</b>                                      | <b>21.26</b>                           | <b>204.75</b>                                           | <b>180.42</b>                                      | <b>25.65</b>                           | <b>247.83</b>                                           | <b>183.03</b>                                      |

**Table S7.** Runoff and losses volumes and peak discharges in sub-basins of W. Al-Rashrash during return periods (25, 50 and 100 years).

| Sub-basin No. | 25-year                                |                                                         |                                                    | 50-year                                |                                                         |                                                    | 100-year                               |                                                         |                                                     |
|---------------|----------------------------------------|---------------------------------------------------------|----------------------------------------------------|----------------------------------------|---------------------------------------------------------|----------------------------------------------------|----------------------------------------|---------------------------------------------------------|-----------------------------------------------------|
|               | Peak Dis-charge<br>(m <sup>3</sup> /s) | Discharge Volume<br>(×10 <sup>-3</sup> m <sup>3</sup> ) | Loss volume<br>(×10 <sup>-3</sup> m <sup>3</sup> ) | Peak Dis-charge<br>(m <sup>3</sup> /s) | Discharge Volume<br>(×10 <sup>-3</sup> m <sup>3</sup> ) | Loss volume<br>(×10 <sup>-3</sup> m <sup>3</sup> ) | Peak Dis-charge<br>(m <sup>3</sup> /s) | Discharge Volume<br>(×10 <sup>-3</sup> m <sup>3</sup> ) | Loss Vol-ume<br>(×10 <sup>-3</sup> m <sup>3</sup> ) |
| 1             | 4.00                                   | 128.60                                                  | 522.00                                             | 7.50                                   | 128.60                                                  | 588.70                                             | 12.30                                  | 195.20                                                  | 652.60                                              |
| 2             | 32.10                                  | 224.20                                                  | 171.20                                             | 42.00                                  | 292.90                                                  | 180.40                                             | 53.10                                  | 371.10                                                  | 188.30                                              |
| 3             | 37.40                                  | 259.20                                                  | 148.00                                             | 47.90                                  | 332.70                                                  | 154.60                                             | 59.50                                  | 415.80                                                  | 160.10                                              |
| 4             | 21.80                                  | 192.90                                                  | 216.90                                             | 29.70                                  | 259.00                                                  | 231.50                                             | 38.60                                  | 335.40                                                  | 244.30                                              |
| 5             | 15.60                                  | 110.60                                                  | 149.10                                             | 21.60                                  | 150.70                                                  | 160.10                                             | 28.50                                  | 197.50                                                  | 169.90                                              |
| 6             | 32.90                                  | 307.80                                                  | 242.90                                             | 43.30                                  | 402.90                                                  | 256.20                                             | 55.10                                  | 511.30                                                  | 267.60                                              |
| 7             | 22.60                                  | 199.40                                                  | 268.70                                             | 31.30                                  | 271.70                                                  | 288.70                                             | 41.40                                  | 356.00                                                  | 306.20                                              |
| 8             | 20.30                                  | 127.80                                                  | 81.90                                              | 26.30                                  | 165.10                                                  | 85.80                                              | 33.00                                  | 207.40                                                  | 89.50                                               |
| 9             | 25.80                                  | 167.30                                                  | 63.10                                              | 32.40                                  | 210.60                                                  | 65.10                                              | 39.60                                  | 259.00                                                  | 66.90                                               |
| 10            | 45.40                                  | 400.60                                                  | 276.00                                             | 59.00                                  | 519.90                                                  | 289.90                                             | 74.20                                  | 655.30                                                  | 301.70                                              |
| 11            | 30.30                                  | 223.40                                                  | 188.00                                             | 40.10                                  | 293.70                                                  | 198.70                                             | 51.10                                  | 374.00                                                  | 207.90                                              |
| 12            | 23.30                                  | 135.10                                                  | 80.30                                              | 29.90                                  | 173.90                                                  | 83.90                                              | 37.40                                  | 217.70                                                  | 87.00                                               |
| 13            | 80.40                                  | 900.90                                                  | 473.80                                             | 102.70                                 | 1151.60                                                 | 493.70                                             | 127.60                                 | 1434.10                                                 | 510.40                                              |
| 14            | 23.50                                  | 167.80                                                  | 99.70                                              | 30.20                                  | 215.90                                                  | 104.20                                             | 37.60                                  | 270.30                                                  | 108.10                                              |
| 15            | 1.50                                   | 5.20                                                    | 1.90                                               | 1.90                                   | 6.50                                                    | 1.90                                               | 2.30                                   | 8.00                                                    | 2.00                                                |
| 16            | 10.40                                  | 40.20                                                   | 20.30                                              | 13.20                                  | 51.30                                                   | 21.10                                              | 16.30                                  | 63.80                                                   | 21.80                                               |
| 17            | 15.80                                  | 77.10                                                   | 27.50                                              | 19.70                                  | 96.90                                                   | 28.40                                              | 24.00                                  | 118.90                                                  | 29.10                                               |
| 18            | 40.00                                  | 278.40                                                  | 122.20                                             | 50.40                                  | 352.70                                                  | 126.80                                             | 61.90                                  | 436.20                                                  | 130.50                                              |
| 19            | 39.00                                  | 267.40                                                  | 111.80                                             | 48.90                                  | 338.10                                                  | 115.80                                             | 59.90                                  | 417.30                                                  | 119.10                                              |
| 20            | 10.80                                  | 46.10                                                   | 16.50                                              | 13.50                                  | 57.90                                                   | 17.00                                              | 16.50                                  | 71.10                                                   | 17.40                                               |
| 21            | 56.40                                  | 382.80                                                  | 201.30                                             | 71.80                                  | 489.40                                                  | 209.80                                             | 89.30                                  | 609.50                                                  | 216.90                                              |
| 22            | 19.80                                  | 97.30                                                   | 34.70                                              | 24.70                                  | 122.20                                                  | 35.80                                              | 30.20                                  | 150.00                                                  | 36.70                                               |
| 23            | 72.80                                  | 537.10                                                  | 331.50                                             | 93.90                                  | 692.60                                                  | 347.10                                             | 117.40                                 | 868.50                                                  | 360.20                                              |
| 24            | 32.00                                  | 162.90                                                  | 105.50                                             | 41.00                                  | 210.10                                                  | 10.5.5                                             | 51.00                                  | 263.40                                                  | 109.20                                              |
| 25            | 67.80                                  | 678.20                                                  | 721.90                                             | 91.40                                  | 906.60                                                  | 769.10                                             | 118.50                                 | 1170.10                                                 | 810.30                                              |
| 26            | 8.10                                   | 135.70                                                  | 681.60                                             | 14.20                                  | 215.10                                                  | 763.10                                             | 22.30                                  | 316.00                                                  | 840.20                                              |
| 27            | 56.40                                  | 382.80                                                  | 243.60                                             | 0.70                                   | 20.60                                                   | 281.80                                             | 1.40                                   | 37.80                                                   | 319.50                                              |
| <b>Min.</b>   | <b>1.50</b>                            | <b>5.20</b>                                             | <b>1.90</b>                                        | <b>0.70</b>                            | <b>6.50</b>                                             | <b>1.90</b>                                        | <b>1.40</b>                            | <b>8.00</b>                                             | <b>2.00</b>                                         |
| <b>Max.</b>   | <b>80.40</b>                           | <b>900.90</b>                                           | <b>721.90</b>                                      | <b>102.70</b>                          | <b>1151.60</b>                                          | <b>769.10</b>                                      | <b>127.60</b>                          | <b>1434.10</b>                                          | <b>840.20</b>                                       |
| <b>Mean</b>   | <b>31.34</b>                           | <b>245.81</b>                                           | <b>207.48</b>                                      | <b>38.12</b>                           | <b>301.08</b>                                           | <b>226.89</b>                                      | <b>48.15</b>                           | <b>382.62</b>                                           | <b>236.05</b>                                       |

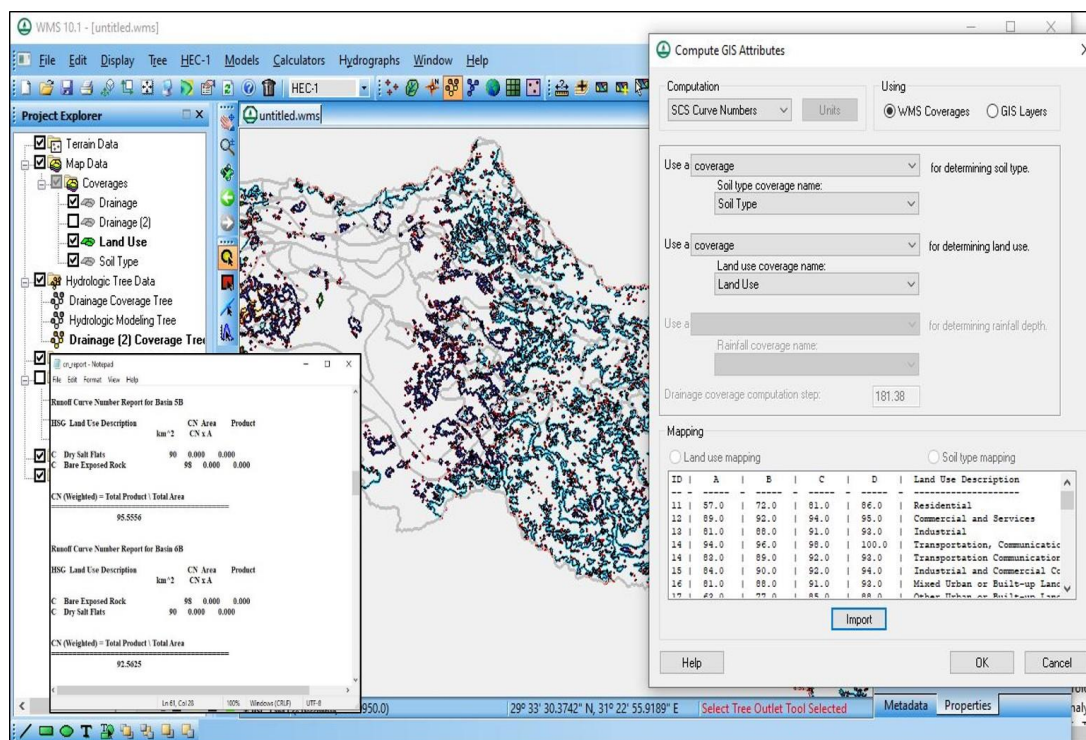

Figure S1. Calculation of CN values of sub-basins using WMS software.

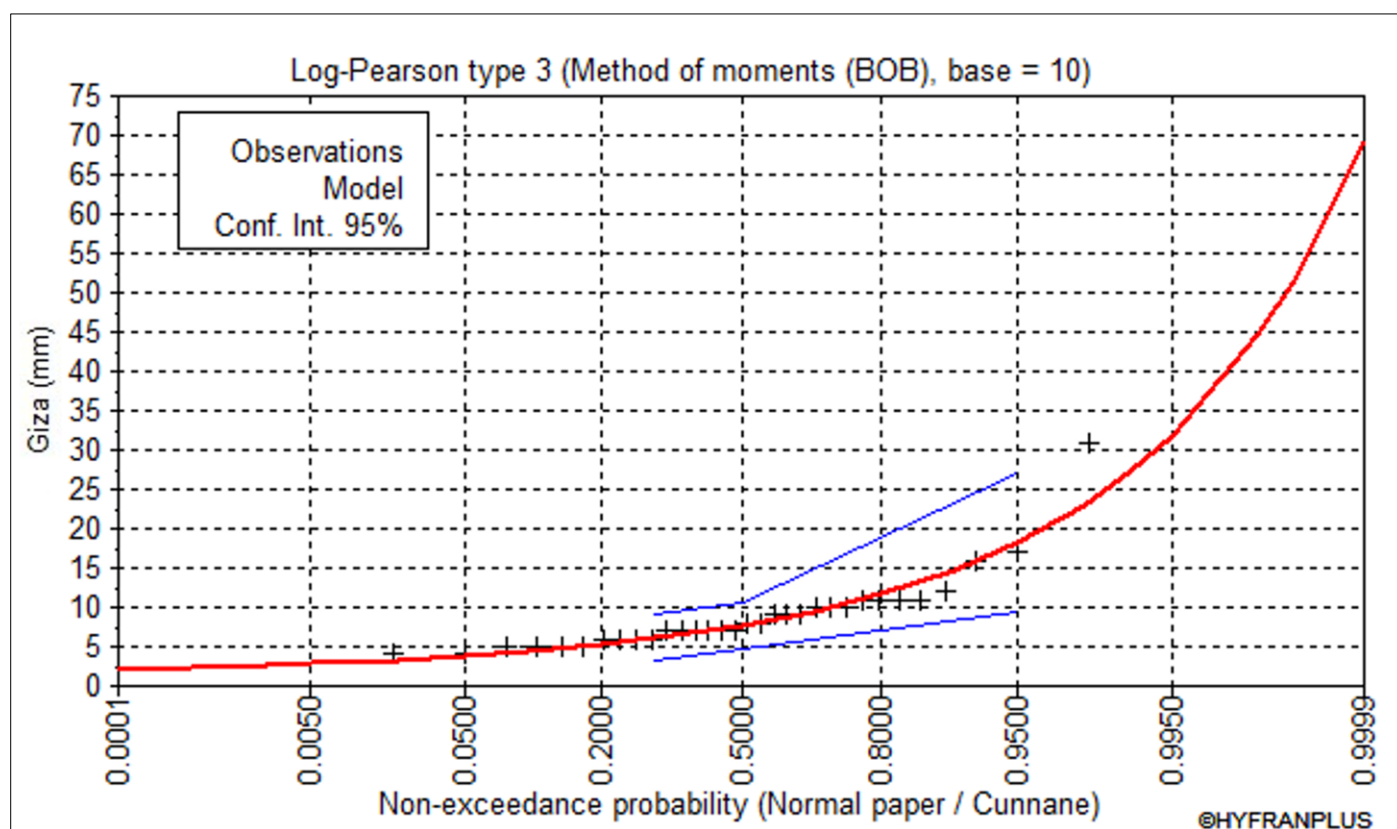

Figure S2. The rainfall theoretical frequency distributions fitting of Log-Pearson type 3.



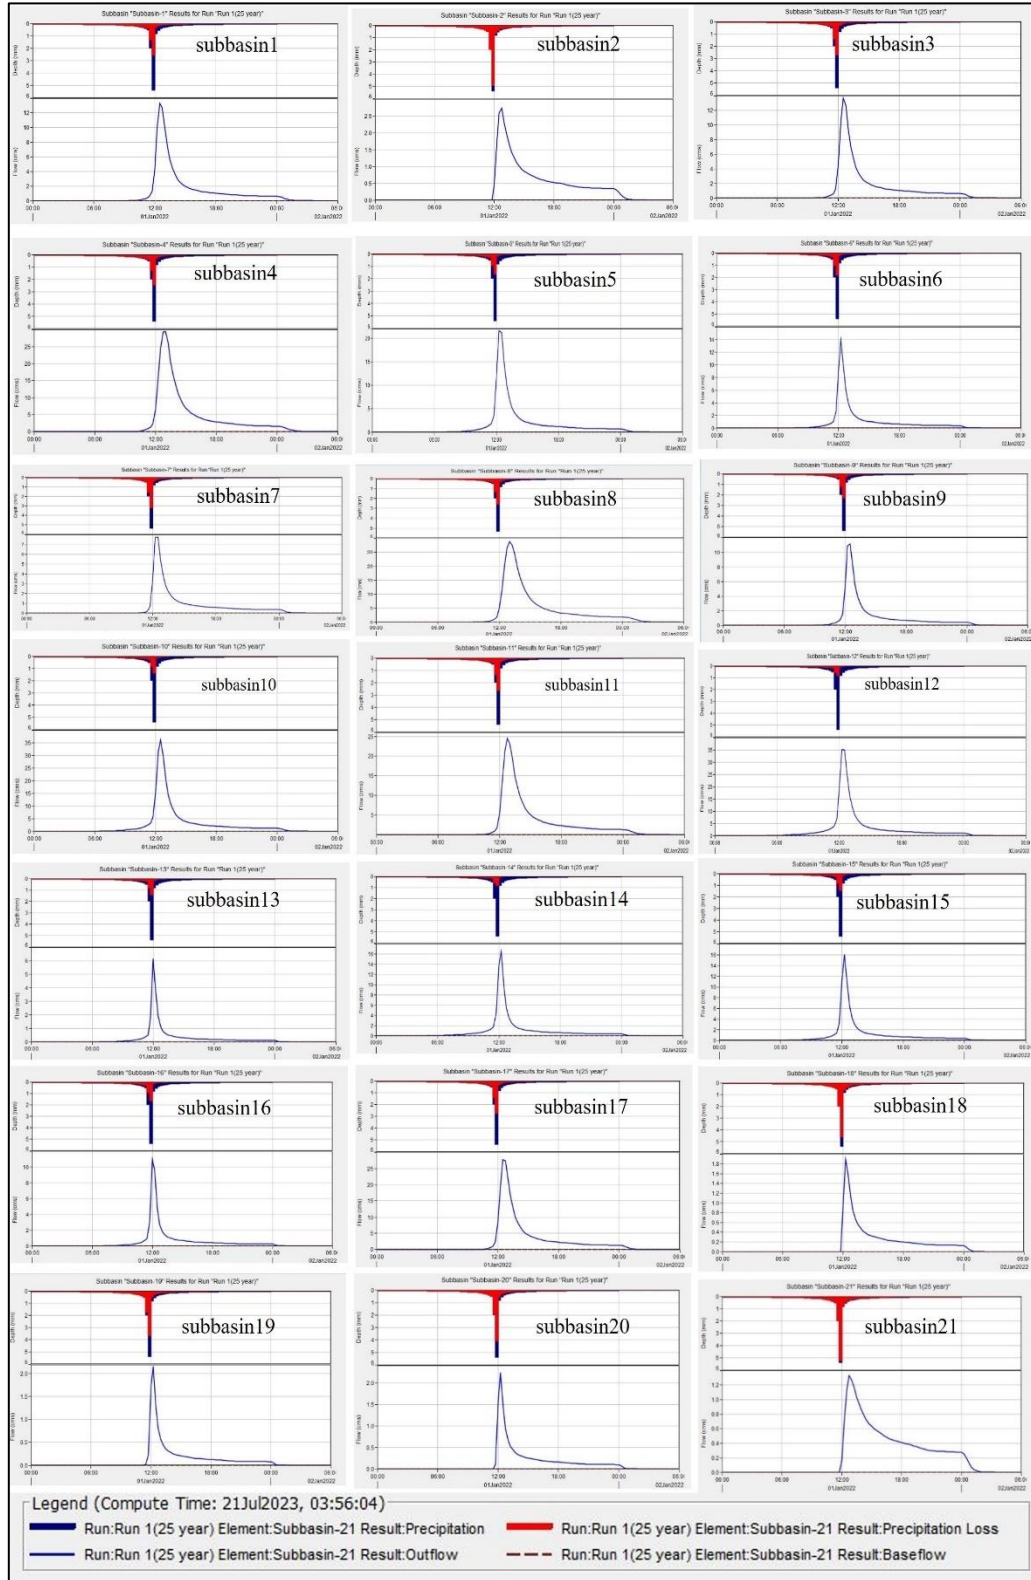

Figure S3. Hydrographs of sub-basins of W. An-Nawayah during 25-year return period.

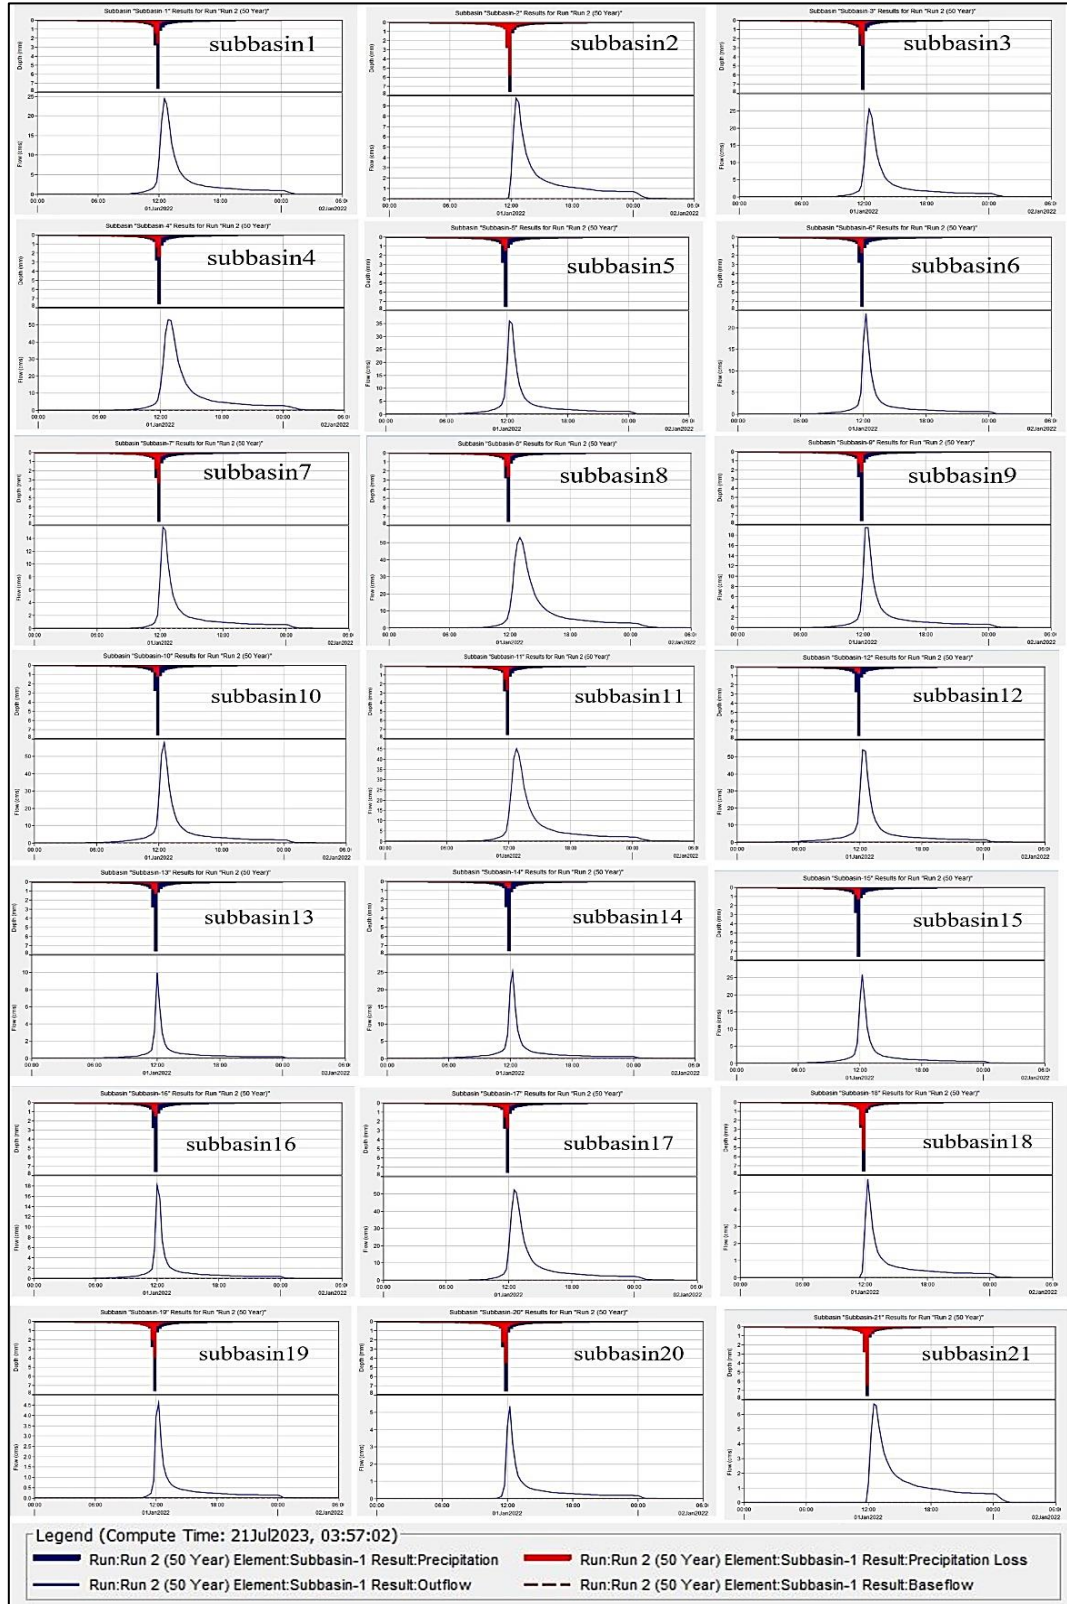

Figure S4. Hydrographs of sub-basins of W. An-Nawayah during 50-year return period.

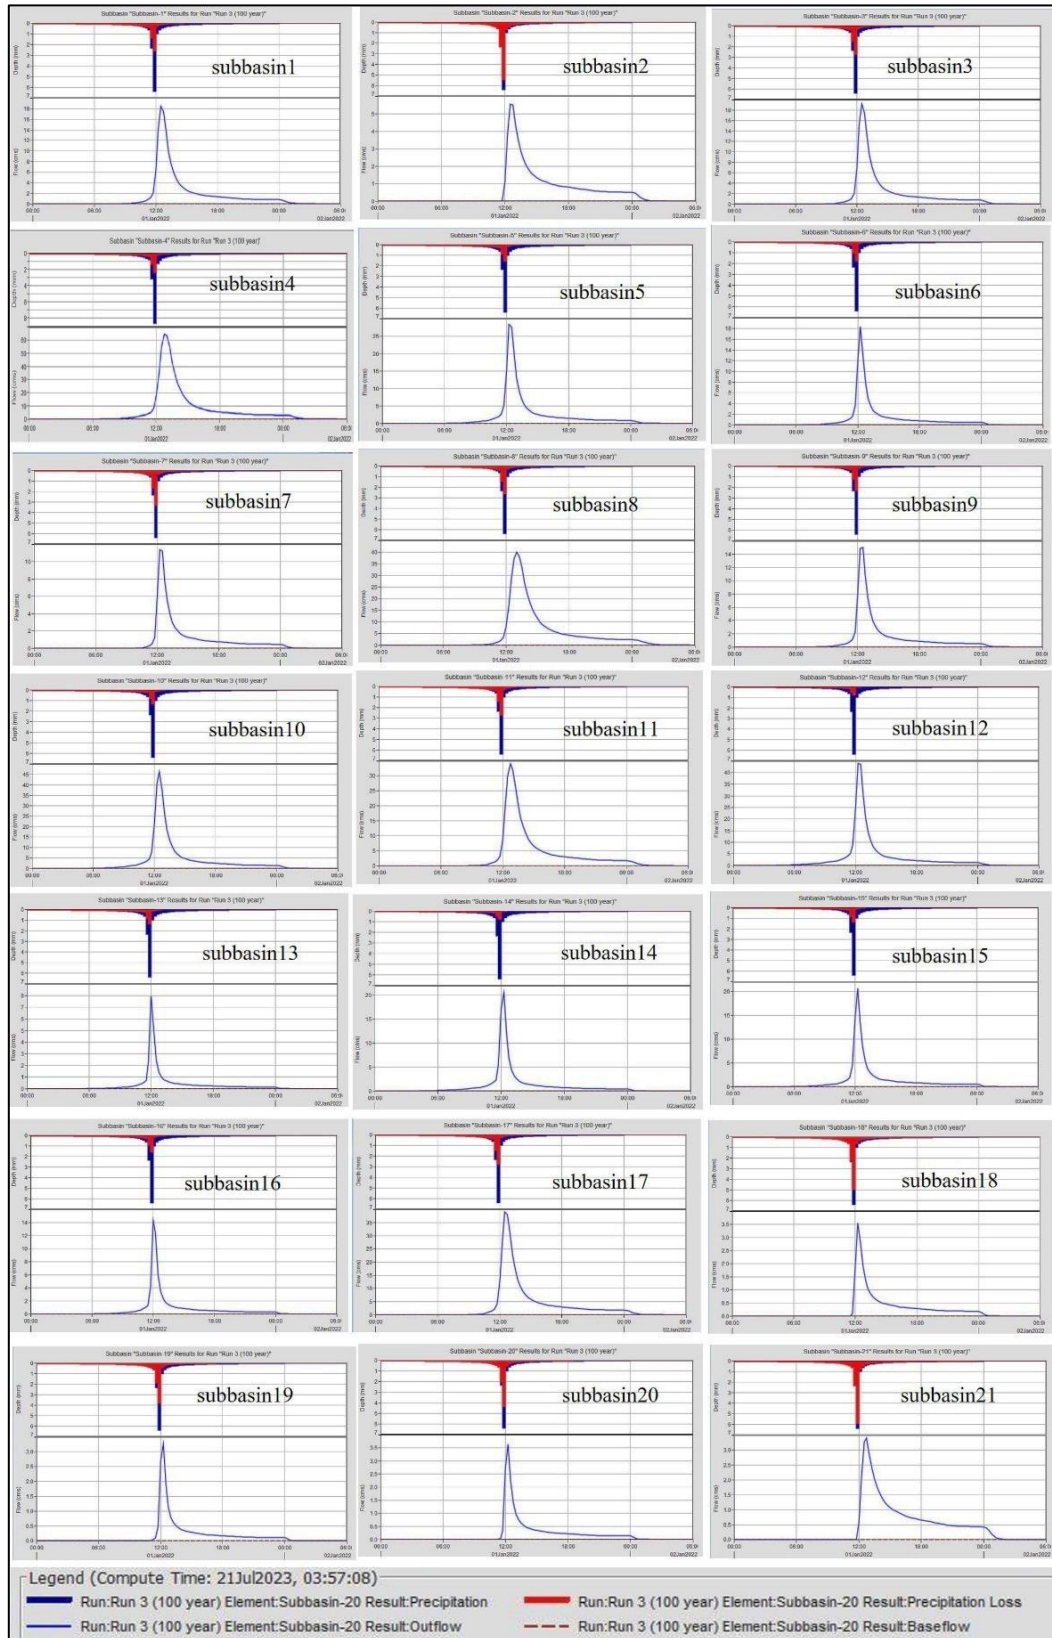

Figure S5. Hydrographs of sub-basins of W. An-Nawayah during 100-year return period.



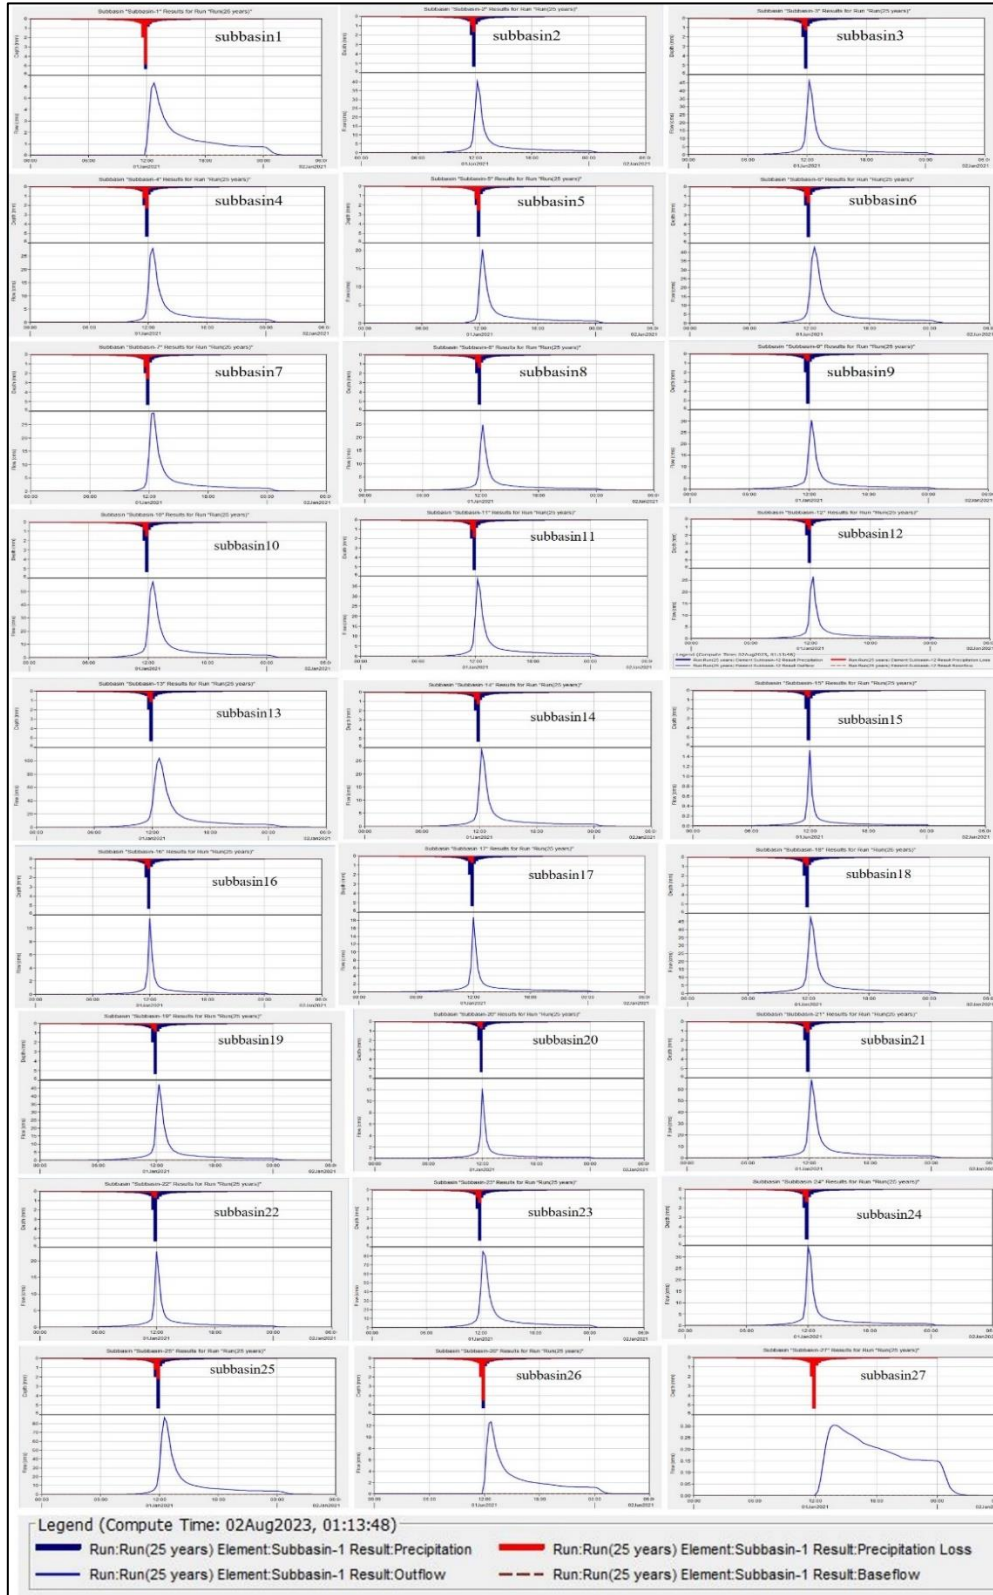

Figure S6. Hydrographs of sub-basins of W. Al-Rashrah during 25-year return period.

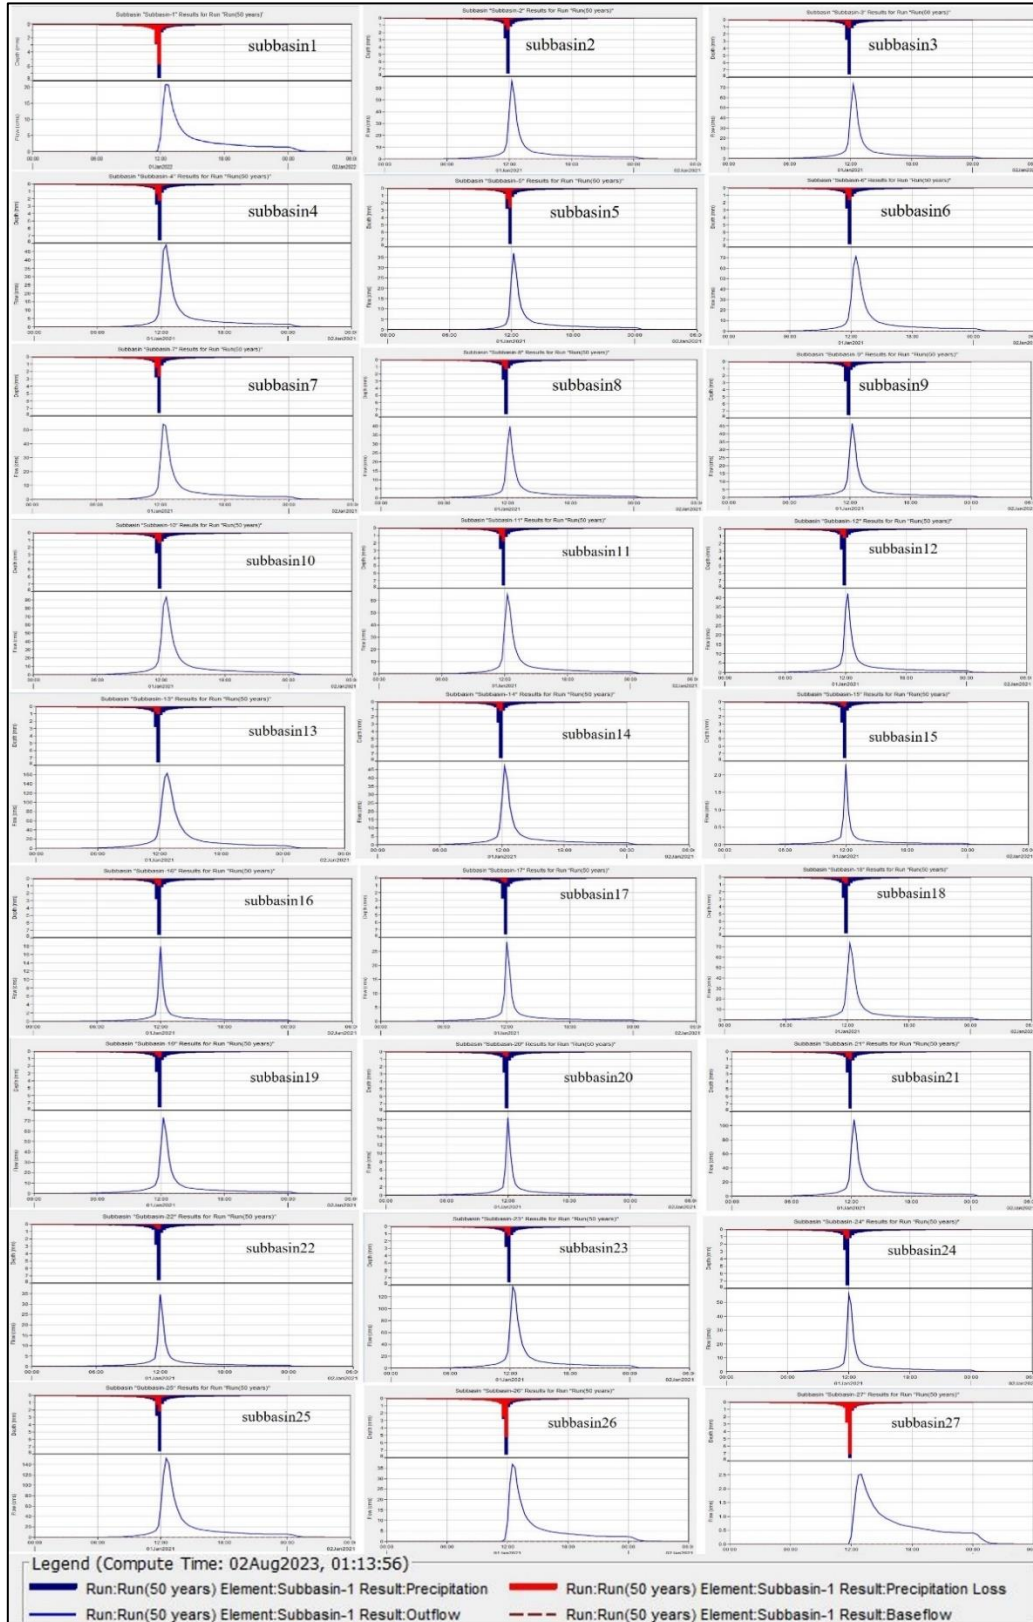

Figure S7. Hydrographs of sub-basins of W. Al-Rashrash during 50-year return period.

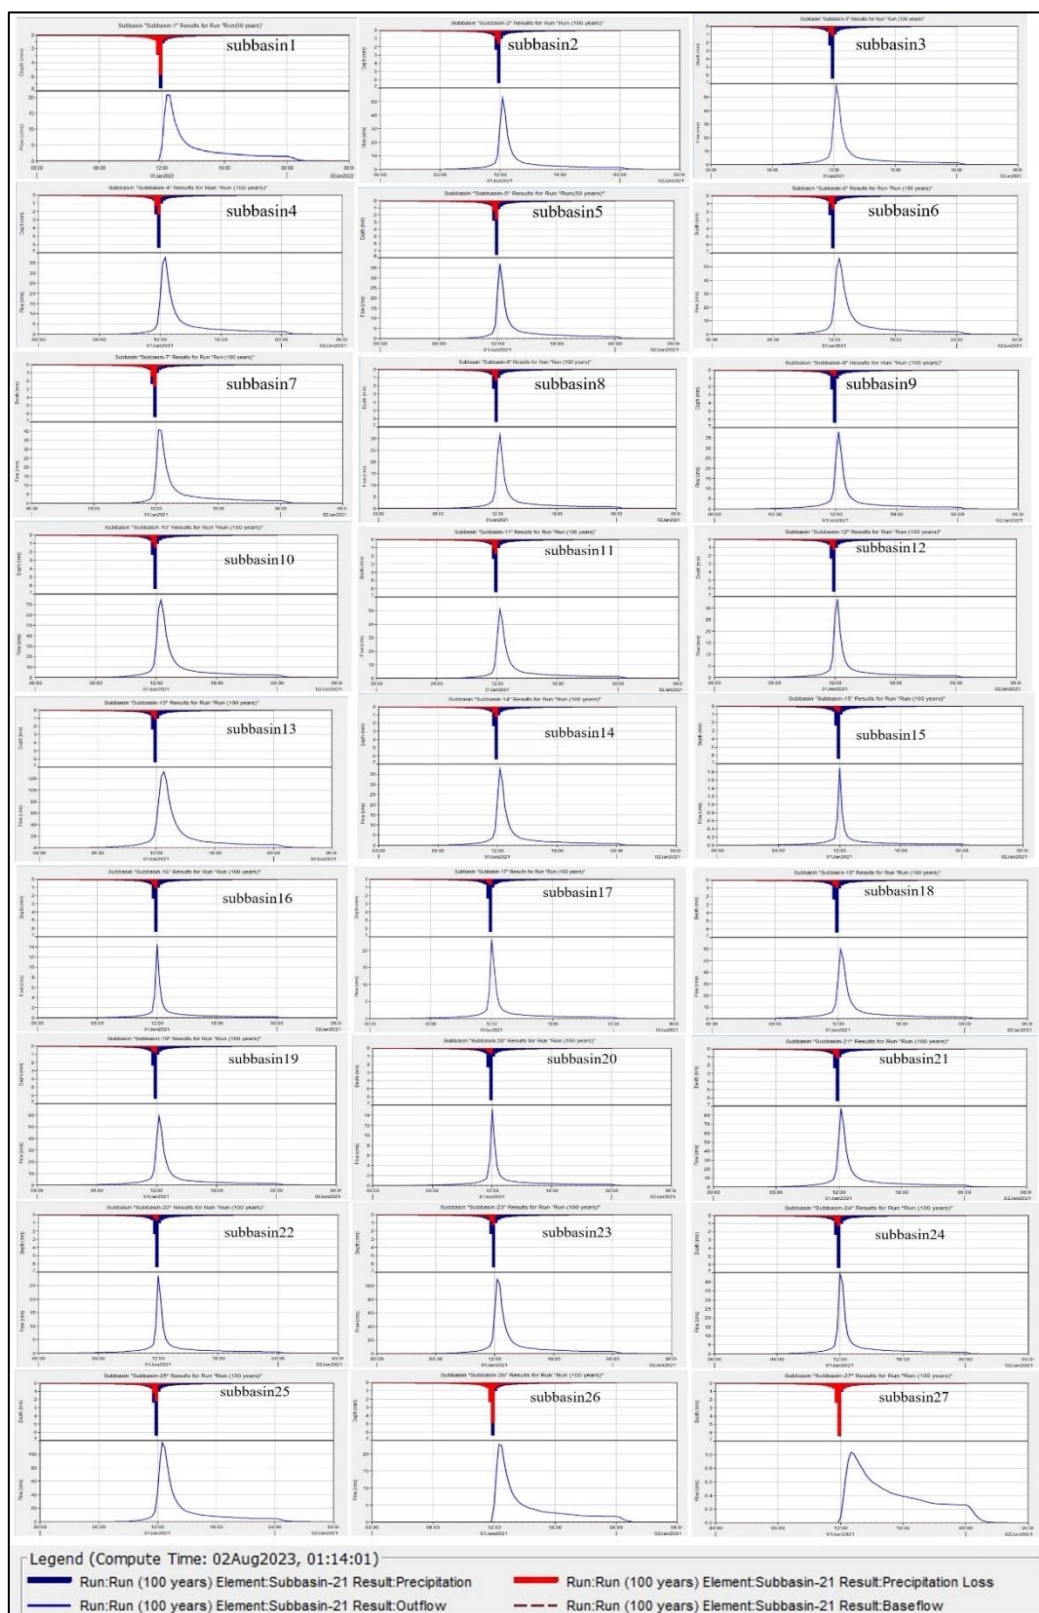

Figure S8. Hydrographs of sub-basins of W. Al-Rashrash during 100-year return period.
